# Supplementary material
Source: ML conference proceedings conference paper supplement (https://openaccess.thecvf.com/content/ICCV2023/html/Zhang_Meta-ZSDETR_Zero-shot_DETR_ICCV_2023_paper.html)
Supplement: Supplementary file 1 [file Zhang_Meta-ZSDETR_Zero-shot_DETR_ICCV_2023_supplemental.pdf]

# Supplementary Material for Meta-ZSDETR: Zero-shot DETR with Meta-learning

Lu Zhang<sup>1</sup> Chenbo Zhang<sup>1</sup> Jiajia Zhao<sup>2</sup> Jihong Guan<sup>3</sup> Shuigeng Zhou<sup>1\*</sup>

<sup>1</sup>Shanghai Key Lab of Intelligent Information Processing, and School of Computer Science, Fudan University, China

<sup>2</sup>Science and Technology on Complex System Control and Intelligent Agent Cooperation Laboratory, China

<sup>3</sup>Department of Computer Science & Technology, Tongji University, China

{l\_zhang19, sgzhou}@fudan.edu.cn, cbzhang21@m.fudan.edu.cn

zhaojiajia1982@gmail.com, jhguan@tongji.edu.cn

## 1. Additional experimental results

Here, we report the class-wise AP in 65/15 split of MS COCO. The results are shown in Tab. 1. As we can see, Meta-ZSDETR achieves the best results in most categories, and boosts the mAP to above 20 for the first time, proving the effectiveness of our method.

| 65/15          | airp        | trai        | metr       | cat         | bear        | scse        | frbe        | snrd        | fork        | swic        | hdog       | tlet        | mose       | tstr       | hier       | mAP         |
|----------------|-------------|-------------|------------|-------------|-------------|-------------|-------------|-------------|-------------|-------------|------------|-------------|------------|------------|------------|-------------|
| PL [3]         | 20          | 48.2        | 0.6        | 28.3        | 13.8        | 12.4        | <b>21.8</b> | 15.1        | 8.9         | 8.5         | 0.9        | 5.7         | 0.0        | 1.7        | 0.0        | 12.4        |
| SU [1]         | 10.1        | 48.7        | 1.2        | 64.0        | 64.1        | 12.2        | 0.7         | 28          | 16.4        | 19.4        | 0.1        | 18.7        | 1.2        | 0.5        | 0.2        | 19.0        |
| Robust-Syn [2] | 20.8        | 53.0        | 1.3        | <b>64.3</b> | 55.5        | 11.6        | 0.4         | <b>31.3</b> | 18.0        | 20.3        | 0.1        | 15.2        | <b>4.2</b> | 0.5        | 0.6        | 19.8        |
| Meta-ZSDETR    | <b>22.1</b> | <b>58.1</b> | <b>5.9</b> | 60.6        | <b>69.2</b> | <b>15.4</b> | 3.2         | 28.0        | <b>23.4</b> | <b>23.2</b> | <b>2.3</b> | <b>20.7</b> | 1.5        | <b>2.9</b> | <b>1.0</b> | <b>22.5</b> |

Table 1. Class-wise AP and mAP on unseen classes of MS COCO dataset in ZSD setting with IoU=0.5.

## References

- [1] Nasir Hayat, Munawar Hayat, Shafin Rahman, Salman Khan, Syed Waqas Zamir, and Fahad Shahbaz Khan. Synthesizing the unseen for zero-shot object detection. In *ACCV*, 2020. 1
- [2] Peiliang Huang, Junwei Han, De Cheng, and Dingwen Zhang. Robust region feature synthesizer for zero-shot object detection. In *Proceedings of the IEEE/CVF Conference on Computer Vision and Pattern Recognition*, pages 7622–7631, 2022. 1
- [3] Shafin Rahman, Salman Khan, and Nick Barnes. Improved visual-semantic alignment for zero-shot object detection. In *AAAI*, volume 34, pages 11932–11939, 2020. 1
- [4] Caixia Yan, Xiaojun Chang, Minnan Luo, Huan Liu, Xiaoqin Zhang, and Qinghua Zheng. Semantics-guided contrastive network for zero-shot object detection. *IEEE Transactions on Pattern Analysis and Machine Intelligence*, 2022.
- [5] Ye Zheng, Ruoran Huang, Chuanqi Han, Xi Huang, and Li Cui. Background learnable cascade for zero-shot object detection. In *ACCV*, 2020.

---

\*correspondence author
